# Supplementary material for: Functional significance of rare neuroligin 1 variants found in autism
Source: PubMed Central journal article supplement (PMC5571902; doi:10.1371/journal.pgen.1006940), 2017-08-25

**Fig. S1**

**A**

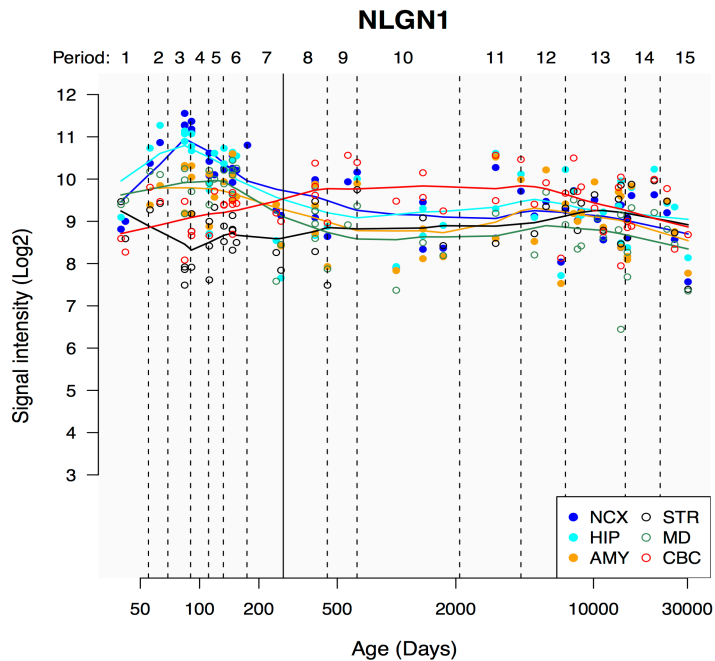

**B**

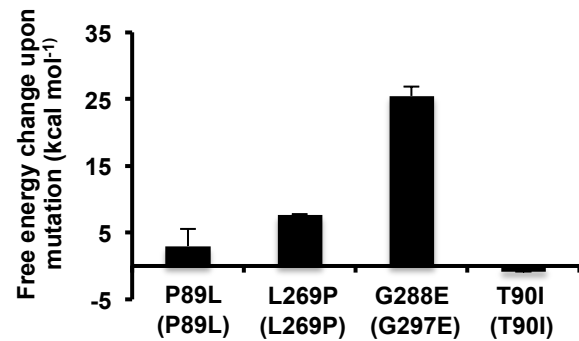

Supplement: pgen.1006940.s001.pdf [file pgen.1006940.s001.pdf]
